# Supplementary material
Source: PubMed Central journal article supplement (PMC2993423)
Supplement: 1014074107_pnas.201014074SI.pdf [file 1014074107_pnas.201014074SI.pdf]

# Supporting Information

Mallery et al. 10.1073/pnas.1014074107

## SI Materials and Methods

**Cells Lines.** HEK293T, HeLa, TE671, QT35, and HT1080 were maintained in DMEM supplemented with 10% FBS, 100 U/mL penicillin, 100  $\mu$ g/mL streptomycin at 37 °C in a humid incubator. 293F cells (Invitrogen) were grown in serum-free Freestyle medium (Invitrogen) in an orbital shaker at 50 rpm at 37 °C. Where appropriate, cells were selected in 1 mg/mL G418 (Invitrogen) or 2  $\mu$ g/mL puromycin (Sigma-Aldrich).

**Virus Production.** Adenovirus Ad5-GFP (1) was grown in trans-complementation cell line 293F for 72 h, before three rounds of freeze-thaw to release virus particles and filtration at 0.45  $\mu$ m. Virus stock was purified by two rounds of ultracentrifugation banding on a caesium chloride gradient, dialyzed into PBS/10% glycerol, and frozen at -80 °C until required. Titters of purified virus were typically  $10^8$  to  $10^9$  IU/mL

**Generation of Stable Knockdown and Overexpressing Cell Lines.** Human tripartite motif-containing 21 (TRIM21) DNA was cloned into pDONAI (Takara) as a NotI/Sall restriction fragment to generate pDON-T21. DNA encoding an shRNA directed to human TRIM21 sequence GCAGCACGCTTGACAATGA was cloned into pSIREN Retro-Q (Clontech) to produce pSIREN-shT21. Control shRNA directed to luciferase was encoded by pSIREN-shLuc. Retroviral transduction particles were produced by transfection of  $4 \times 10^6$  HEK293T cells with 5  $\mu$ g of pDON-T21, pSIREN-shT21, empty pDONAI, or pSIREN-Luc along with 5  $\mu$ g each of MLV gag-pol expression plasmid pCMV $\beta$  and VSV-G expression plasmid pMDG (2). Supernatant was harvested after 72 h and filtered at 0.45  $\mu$ m and used to transduce HeLa cells. Stably transduced cells were selected with G418 (pDON-T21, pDONAI) or puromycin (pSIREN-shT21, pSIREN-shLuc). Levels of TRIM21 protein were monitored by Western blotting (sc-25351; Santa Cruz Biotechnology).

**Transient siRNA Knockdown.** Cells were plated at  $1 \times 10^5$  cells per well in six-well plates and allowed to adhere overnight. siRNA oligonucleotides T21siRNA1 (UCAUUGUCAAGCGUGCUGC; Dharmacon) and T21siRNA2 (UGGCAUGGAGGCACCUGAAGGUGG; Invitrogen) (150 pmol each) or 300 pmol control oligo (Invitrogen) were transfected into cells using Oligofectamine (Invitrogen). Cells were washed after 3 h and incubated for 72 h before infection. Where indicated, 1,000 U IFN- $\alpha$  (PBL InterferonSource) was added 48 h after knockdown.

**Virus Neutralization Assays.** HeLa cells were seeded at  $1 \times 10^5$  cells per well in 2 mL complete DMEM in six-well plates the day before infection. Where stated, cells were incubated with 1,000 U IFN- $\alpha$ . Adv5-GFP [ $5 \times 10^4$  infectious units (IU)] was incubated with antibody in a 10- $\mu$ L volume for 30 min at room temperature before addition to cells. Cells were incubated for 48 h before washing, trypsinization, and fixing in 4% paraformaldehyde. GFP-positive cells were enumerated by flow cytometry (FACSCalibur; BD Biosciences).

Goat antiadenovirus polyclonal antibody was used in all virus neutralization assay experiments unless otherwise stated (AB1056; Millipore). Other antibodies tested included pooled human serum IgG and IgM (090707 and 090713; Athens Research and Technology), anti-hexon polyclonal IgG (0151-9004; Abd Serotec), and purified antiadenovirus 5 hexon mouse monoclonal IgG (hybridoma TC31-9C12.C9 obtained from the Developmental Studies Hybridoma Bank, University of Iowa).

**Immunofluorescence.** HeLa cells ( $2.5 \times 10^4$ ) were seeded onto coverslips in 24-well plates and allowed to adhere overnight. Cells were washed twice in DMEM before infection. Adv5-GFP ( $5 \times 10^4$  IU) was incubated with polyclonal or monoclonal anti-hexon adenovirus antibody (e.g., 500 ng of mouse monoclonal IgG in a 20- $\mu$ L volume for 30 min at room temperature before addition of 230  $\mu$ L DMEM). Cells were infected with 250  $\mu$ L of this mixture for 30 min at 37 °C. Cells were washed three times with PBS, fixed with 4% paraformaldehyde, permeabilized with 0.5% Triton X-100 in PBS, and blocked with PBS-BSA (5% BSA, 0.1% Tween in PBS) for 1 h. Immunostaining for TRIM21 was performed with a rabbit 50-kDa Ro/SSA primary antibody 20960 (Santa Cruz Biotechnology) and for ubiquitin with a goat primary 6085 (Santa Cruz Biotechnology) at 1:200 dilution in PBS-BSA. Alexa Fluor-conjugated secondary antibodies (Invitrogen) were used to detect primary antibodies at 1:200 dilution. Streptavidin-coated 0.25- $\mu$ m latex beads (Sigma-Aldrich) were incubated with rabbit anti-streptavidin polyclonal serum S6390 (Sigma-Aldrich) overnight at 4 °C. Beads were washed three times with PBS and transfected into cells using Oligofectamine. Cells were washed with PBS 3 h after transfection and fixed as above. Immunostaining for TRIM21 was performed with immune serum raised in mouse against recombinant TRIM21 RING, B Box and coiled-coil domains (RBCC) and for conjugated ubiquitin as above, both at 1:200 dilution in PBS-BSA. Alexa Fluor-conjugated secondary antibodies (Invitrogen) were used to detect primary antibodies at 1:500 dilution. Confocal images were taken using a Zeiss 63 $\times$  lens on a Jena LSM 710 microscope (Carl Zeiss MicroImaging).

**Fate-of-Capsid Assay.** HeLa cells were plated at  $2 \times 10^5$  cells per well in a six-well plate in 2 mL DMEM and left overnight to attach. A proportion of the wells were treated with 8  $\mu$ M MG132 (Boston Biochem) for 4 h. Untreated cells were exposed to an equivalent quantity of DMSO for the duration of the treatment. Adv5-GFP ( $4 \times 10^7$  IU) was mixed with 6  $\mu$ g Ad5 monoclonal antibody and incubated at room temperature for 30 min, then added onto the cells in 1 mL complete media. Infections were incubated at 37 °C for 1 h before infection mixtures were removed and replaced with DMEM. Cells were harvested at indicated time points after initial infection and boiled in 100  $\mu$ L sample buffer with reducing agent (Invitrogen). Virus was detected with goat anti-hexon Ad5 (1:1,000, AB1056; Millipore) and HRP-conjugated anti-goat IgG (1:5,000, sc-2056; Santa Cruz Biotechnology). Antibody was detected with donkey anti-mouse IgG (1:500, AP192; Millipore) and protein A-HRP (1:2,000, 610438; BD Biosciences). TRIM21 was detected with TRIM21 RBCC immune sera (1:2,000) and protein A HRP to avoid cross-reaction to the mouse antibody on the gel.

**Immunoblotting.** Cells from a single well of a six-well plate were scraped off, resuspended, and heated at 98 °C for 5 min in 100  $\mu$ L 1 $\times$  LDS sample buffer with reducing agent (Invitrogen). Equal volumes were loaded onto a 4–12% NuPAGE gel and electrophoresed in 1 $\times$  Mops buffer (Invitrogen). Proteins were transferred onto Protran nitrocellulose membrane (Whatman) and immunoblotted with the indicated antibodies. In all cases blots were incubated with antibody in PBS containing 5% milk and 0.1% Tween and washed with PBS-Tween. Visualization was carried out using a ECL Plus Western Blotting Detection System (GE Healthcare). Western blots were stripped for reprobing as per manufacturers instructions with 1 $\times$  Re-Blot Plus Strong So-

lution (2504; Millipore). Loading control blots were carried out with rabbit polyclonal  $\beta$ -actin (1:1,000, #4967; Cell Signaling).

**Fluorescence Titration.** Full-length and  $\Delta$ RING-Box recombinant TRIM21 was expressed as maltose binding protein (MBP)-fusion proteins in *Escherichia coli* and purified using amylose resin and size-exclusion chromatography (SEC). The MBP tag was removed via tev protease cleavage, and cleaved TRIM21 was dialyzed into 20 mM Tris (pH 8), 100 mM NaCl, and 1 mM DTT. Steady-state fluorescence titration experiments were performed at 20 °C using a Cary Eclipse fluorescence spectrophotometer (Varian) with excitation at 296 nm and emission at 335 nm, using 15-nm slit widths and a PMT voltage of 850. The quenching in intrinsic TRIM21 tryptophan fluorescence upon titration of IgG was measured with an averaging time of 5 s. Each titration was fit using Kaleidagraph (Synergy Software) to the quadratic expression  $F = F_{TR} + f'((-I_0 - TR_0 + K_d) \pm (((I_0 - TR_0 + K_d)^2 + (4K_d TR_0))^{1/2}))/2$ ; where F is the observed fluorescence,  $F_{TR}$  is the molar TRIM21 fluorescence,  $f'$  is the molar change in fluorescence,  $(TR_0)$  is the total TRIM21 concentration,  $(I_0)$  is the total antibody concentration, and  $K_d$  is the dissociation constant.

**Fluorescence Anisotropy.** The PRYSPRY domain of TRIM21 was expressed and purified as previously described (3, 4). The protein was labeled with Alexa Fluor 488 5-SDP ester (Invitrogen) and dialyzed into 50 mM Tris (pH 8) with 200 mM NaCl. Anisotropy experiments were performed using a Cary Eclipse fluorescence spectrophotometer (Varian) with excitation at 488 nm and emission at 530 nm, using 10-nm slit widths and a photomultiplier voltage of 600. IgM (Athens Research and Technology) was titrated into 50 nM PRYSPRY and the polarized fluorescence averaged over 5 s. The dissociation constant ( $K_d$ ) was determined by fitting the change in anisotropy to the quadratic expression given above using Kaleidagraph (Synergy Software).

**SEC MALS.** SEC multiangle light scattering (MALS) was performed using a Wyatt Heleos II 18-angle light-scattering instrument coupled to a Wyatt Optilab rEX online refractive index detector. Samples were prepared as described above and resolved on a Superdex S-200 analytical gel filtration column running at 0.5 mL/min before passing through the light-scattering and refractive index detectors in a standard SEC MALS format. Protein concentration was determined from the refractive index based on 0.186  $\Delta$ RI for 1 mg/mL and combined with the observed scattered intensity to calculate absolute molecular mass using Wyatt's ASTRA analysis software. The major species in TRIM21

has a mass of 107 kDa averaged across the indicated region of the peak. The predicted mass of monomeric TRIM21 is 54 kDa, making TRIM21 a dimer in solution and not a trimer as previously reported. SEC MALS of IgG gives the expected mass of 154 kDa with small (<10%) levels of dimer mass 325 kDa, which is typical for IgG. TRIM21-IgG complex resolves as multiple peaks, corresponding to excess IgG with mass and elution volume as previously and a peak with mass  $\approx$ 280 kDa. The 280-kDa peak is consistent with a 1:1 complex of TRIM21:IgG, in which each protein is a homodimer.

**Complementation Neutralization Assay Using Exogenous TRIM21.** HeLa cells were seeded at  $1 \times 10^5$  cells per well in 2 mL complete DMEM in six-well plates the day before infection. Adv5-GFP ( $5 \times 10^4$  IU) was incubated with 4  $\mu$ g goat antiadenovirus polyclonal antibody (AB1056; Millipore) for 15 min before addition of 200  $\mu$ g of appropriate recombinant TRIM21 protein, 100  $\mu$ L total volume, and incubation for a further 15 min at room temperature. Media on the cells were exchanged for this mixture made up to 1 mL with complete DMEM. Cells were incubated at 37 °C in a humid incubator for 48 h and then treated as in a virus neutralization assay (see above).

**In Vitro Ubiquitination Assays.** In vitro assays were carried out largely as previously described (5). Reactions were carried out in 1 $\times$  ubiquitination buffer [50 mM Tris-HCl (pH 7.4), 2.5 mM MgCl<sub>2</sub>, and 0.5 mM DTT] with the addition of 2 mM ATP, 300 ng His-Uba1, 300 ng His-UbcH5c, and 1  $\mu$ g ubiquitin (Sigma) and 50 ng MBP-TRIM21 or MBP-TRIM21  $\Delta$ Ring-Box as indicated. Human Uba1 and UbcH5c were expressed in bacteria and purified using Ni-NTA resin (Qiagen) as previously described (5). Antibody adenovirus mixtures were made by incubating  $5 \times 10^4$  IU Adv5-GFP per 150 ng goat polyclonal antihexon (Millipore) for 30 min, whereby 1  $\mu$ L mix contains  $3.6 \times 10^4$  IU and 106 ng antibody. Increasing amounts were added into the reaction mixture as indicated. Controls with either just Ad5 or antihexon antibody contained  $1.25 \times 10^5$  IU and 150 ng antibody, respectively. Reaction mixtures were incubated at 37 °C for 1 h then stopped by addition of LDS sample buffer and heating to 98 °C for 5 min. Samples were run on a gel and Western blotted for TRIM21 (1:500, sc-25351; Santa Cruz Biotechnology), Ad5 hexon (donkey anti-goat IgG HRP 1:5,000, sc-2056; Santa Cruz Biotechnology), or ubiquitin (1:1,000, FK-2; Enzo Life Sciences) as indicated.

1. de Martin R, Raidl M, Hofer E, Binder BR (1997) Adenovirus-mediated expression of green fluorescent protein. *Gene Ther* 4:493–495.
2. Yee JK, Friedmann T, Burns JC (1994) Generation of high-titer pseudotyped retroviral vectors with very broad host range. *Methods Cell Biol* 43 Pt A:99–112.
3. James LC, Keeble AH, Khan Z, Rhodes DA, Trowsdale J (2007) Structural basis for PRYSPRY-mediated tripartite motif (TRIM) protein function. *Proc Natl Acad Sci USA* 104:6200–6205.

4. Keeble AH, Khan Z, Forster A, James LC (2008) TRIM21 is an IgG receptor that is structurally, thermodynamically, and kinetically conserved. *Proc Natl Acad Sci USA* 105:6045–6050.
5. Mallery DL, Vandenberg CJ, Hiom K (2002) Activation of the E3 ligase function of the BRCA1/BARD1 complex by polyubiquitin chains. *EMBO J* 21:6755–6762.
